# Supplementary material for: Ten-year time trends in preterm birth during a sociodemographic transition period: a retrospective cohort study in Shenzhen, China
Source: HighWire-hosted journal article supplement (doi:10.1136/bmjopen-2020-037266), 2020-10-01
Supplement: bmjopen-2020-037266supp001_data_supplement.pdf [file bmjopen-2020-037266supp001_data_supplement.pdf]

Supplementary Materials

Ten-year time trends in preterm birth during a sociodemographic transition period: a retrospective cohort study in Shenzhen, China

Supplementary Figure 1. Flowchart of Study Population

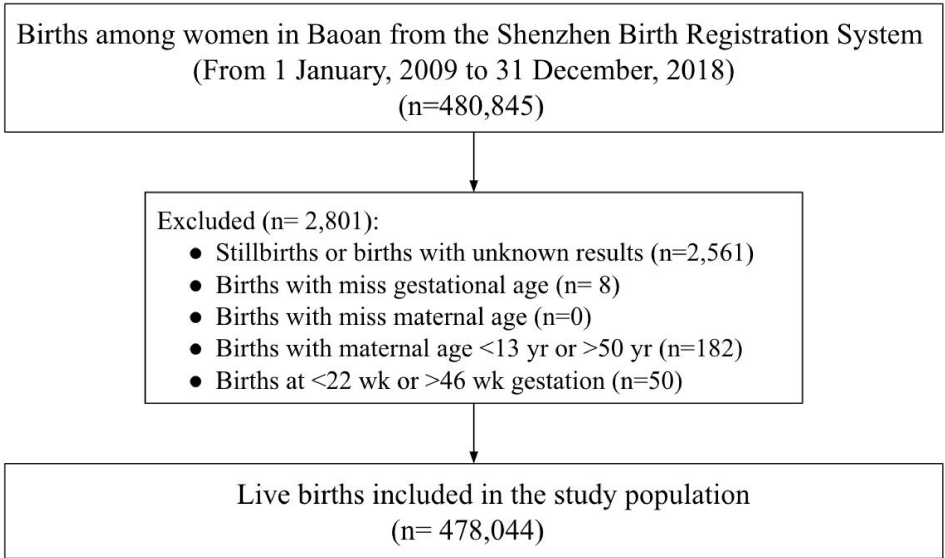

Supplementary Table 1. Temporal Trends in Preterm Birth Rate (%) in Baoan, Shenzhen, 2009 - 2018

|                                        | Year           |                |                |                |                |      |      |      |      |      |
|----------------------------------------|----------------|----------------|----------------|----------------|----------------|------|------|------|------|------|
|                                        | 2009           | 2010           | 2011           | 2012           | 2013           | 2014 | 2015 | 2016 | 2017 | 2018 |
| Overall Preterm Birth Rate             | 5.5            | 5.8            | 5.7            | 5.8            | 5.6            | 5.5  | 5.7  | 6.0  | 6.4  | 6.2  |
| PROM-PTB                               | 0.2            | 0.1            | 0.1            | 0.1            | 0.0            | 0.1  | 0.0  | 0.1  | 0.1  | 0.1  |
| S-PTB                                  | 3.3            | 3.6            | 3.2            | 3.3            | 3.1            | 3.1  | 3.1  | 3.0  | 2.9  | 2.7  |
| MI-PTB                                 | 2.0            | 2.1            | 2.3            | 2.4            | 2.5            | 2.4  | 2.5  | 2.9  | 3.4  | 3.4  |
| Gestational age(week)                  |                |                |                |                |                |      |      |      |      |      |
| < 28                                   | 0.0            | 0.0            | 0.0            | 0.0            | 0.1            | 0.1  | 0.1  | 0.1  | 0.1  | 0.1  |
| 28 -< 32                               | 0.6            | 0.7            | 0.6            | 0.6            | 0.6            | 0.5  | 0.5  | 0.6  | 0.5  | 0.6  |
| 32 -< 37                               | 4.9            | 5.1            | 5.0            | 5.2            | 5.0            | 5.0  | 5.1  | 5.3  | 5.7  | 5.5  |
| Maternal age(year)                     |                |                |                |                |                |      |      |      |      |      |
| ≤ 20                                   | 7.0            | 7.7            | 8.2            | 8.6            | 8.4            | 7.0  | 8.9  | 7.7  | 9.0  | 8.1  |
| 21-35                                  | 5.2            | 5.5            | 5.3            | 5.4            | 5.2            | 5.2  | 5.2  | 5.7  | 6.0  | 5.7  |
| ≥ 36                                   | 8.2            | 7.3            | 7.9            | 8.3            | 8.2            | 8.4  | 8.5  | 9.1  | 8.8  | 8.9  |
| Maternal education                     |                |                |                |                |                |      |      |      |      |      |
| Primary school and below               | 5.3            | 5.5            | 5.9            | 6.3            | 6.9            | 6.2  | 6.7  | 8.4  | 7.4  | 8.7  |
| Secondary and high school              | 5.8            | 6.0            | 5.6            | 5.9            | 5.6            | 5.7  | 5.7  | 6.4  | 6.6  | 6.4  |
| College and above                      | 4.6            | 4.8            | 5.6            | 5.1            | 5.4            | 4.9  | 5.4  | 5.2  | 5.8  | 5.7  |
| Immigrant                              |                |                |                |                |                |      |      |      |      |      |
| No                                     | 5.9            | 6.1            | 6.1            | 6.0            | 6.0            | 5.8  | 6.0  | 6.1  | 6.2  | 5.9  |
| Yes                                    | 5.5            | 5.7            | 5.6            | 5.7            | 5.6            | 5.5  | 5.6  | 6.0  | 6.4  | 6.2  |
| Parity                                 |                |                |                |                |                |      |      |      |      |      |
| 0                                      | 5.9            | 5.8            | 6.2            | 5.8            | 5.9            | 5.7  | 6.1  | 6.3  | 7.0  | 6.6  |
| ≥ 1                                    | 5.0            | 5.7            | 5.1            | 5.7            | 5.3            | 5.4  | 5.2  | 5.9  | 5.92 | 5.9  |
| Multiple pregnancy                     |                |                |                |                |                |      |      |      |      |      |
| No                                     | 4.8            | 5.2            | 5.0            | 5.1            | 4.9            | 4.7  | 4.8  | 5.0  | 5.2  | 4.9  |
| Yes                                    | 42.2           | 38.3           | 43.8           | 46.4           | 41.4           | 44.3 | 41.1 | 46.5 | 50.7 | 50.7 |
| Delivery mode                          |                |                |                |                |                |      |      |      |      |      |
| Vaginal delivery                       | 5.2            | 5.5            | 5.0            | 5.1            | 4.8            | 4.6  | 4.6  | 4.5  | 4.5  | 4.1  |
| Labour induction/<br>Caesarean section | 6.3            | 6.3            | 6.8            | 6.9            | 7.0            | 7.4  | 7.9  | 9.1  | 9.7  | 10.0 |
| Fertility treatment                    |                |                |                |                |                |      |      |      |      |      |
| No                                     | 5.5            | 5.8            | 5.7            | 5.8            | 5.6            | 5.5  | 5.5  | 5.9  | 6.3  | 6.0  |
| Yes                                    | - <sup>b</sup> | 26.0 | 23.8 | 26.4 | 24.1 | 30.3 |

|                                                   |      |     |      |     |      |     |     |     |     |      |
|---------------------------------------------------|------|-----|------|-----|------|-----|-----|-----|-----|------|
| <b>First visit trimester</b>                      |      |     |      |     |      |     |     |     |     |      |
| First trimester                                   | 5.2  | 5.5 | 5.2  | 5.5 | 5.5  | 5.4 | 5.4 | 5.9 | 6.3 | 6.2  |
| Second trimester                                  | 5.6  | 5.7 | 6.5  | 6.6 | 6.5  | 6.7 | 6.2 | 6.8 | 7.1 | 5.5  |
| Third trimester                                   | 5.9  | 6.3 | 5.9  | 6.2 | 6.2  | 6.9 | 7.8 | 7.0 | 7.5 | 9.6  |
| <b>Prenatal care utilisation rate<sup>a</sup></b> |      |     |      |     |      |     |     |     |     |      |
| < 50%                                             | 5.5  | 6.1 | 5.9  | 6.5 | 6.3  | 6.7 | 7.6 | 7.7 | 8.8 | 10.3 |
| 50% - < 110%                                      | 4.8  | 5.0 | 4.8  | 4.8 | 4.7  | 4.8 | 4.6 | 4.9 | 5.4 | 5.2  |
| ≥ 110%                                            | 10.6 | 9.2 | 10.1 | 9.7 | 10.4 | 8.2 | 8.7 | 9.1 | 7.5 | 6.9  |
| <b>Infant gender</b>                              |      |     |      |     |      |     |     |     |     |      |
| Female                                            | 5.2  | 5.4 | 5.3  | 5.2 | 5.0  | 5.2 | 5.2 | 5.4 | 5.7 | 5.5  |
| Male                                              | 5.8  | 6.2 | 6.0  | 6.2 | 6.1  | 5.8 | 6.0 | 6.5 | 6.9 | 6.7  |

a. Prenatal care utilisation rate is defined as the ratio between the actual number of visits and the recommended number.

b. During 2009-2013, there were no records of fertility treatments in the database.

**Supplementary Table 2.** Sensitivity Analysis of Temporal Trends for Overall Preterm Birth Rates in Baoan, Shenzhen, 2009 - 2018

| Year | Preterm birth rate(%) | Risk Ratio(95%CI) | P Value |
|------|-----------------------|-------------------|---------|
| 2009 | 5.5                   | Reference         |         |
| 2010 | 5.8                   | 1.0(1.0,1.0)      | 0.104   |
| 2011 | 5.7                   | 1.0(1.0,1.0)      | 0.493   |
| 2012 | 5.8                   | 1.0(1.0,1.0)      | 0.148   |
| 2013 | 5.6                   | 1.0(1.0,1.0)      | 0.626   |
| 2014 | 5.5                   | 1.0(1.0,1.0)      | 0.986   |
| 2015 | 5.7                   | 1.0(1.0,1.0)      | 0.494   |
| 2016 | 6.0                   | 1.0(1.0,1.0)      | 0.002   |
| 2017 | 6.4                   | 1.0(1.0,1.0)      | 0.000   |
| 2018 | 6.2                   | 1.0(1.0,1.0)      | 0.000   |

**Supplementary Table 3.** Temporal Trends in the Distribution Percentage (%) of Sociodemographic Factors in Baoan, Shenzhen, 2009 - 2018<sup>a</sup>

|                              | Year  |       |       |       |       |       |       |       |       |       |
|------------------------------|-------|-------|-------|-------|-------|-------|-------|-------|-------|-------|
|                              | 2009  | 2010  | 2011  | 2012  | 2013  | 2014  | 2015  | 2016  | 2017  | 2018  |
| All live births              | 38590 | 41912 | 46617 | 54957 | 46861 | 50063 | 45872 | 51328 | 52823 | 49021 |
| <b>Gestational age(week)</b> |       |       |       |       |       |       |       |       |       |       |
| < 28                         | 0.0   | 0.0   | 0.0   | 0.0   | 0.1   | 0.1   | 0.1   | 0.1   | 0.1   | 0.1   |
| 28 -< 32                     | 0.6   | 0.7   | 0.6   | 0.6   | 0.6   | 0.5   | 0.5   | 0.6   | 0.5   | 0.6   |
| 32 -< 37                     | 4.9   | 5.1   | 5.0   | 5.2   | 5.0   | 5.0   | 5.1   | 5.3   | 5.7   | 5.5   |
| ≥ 37                         | 94.5  | 94.2  | 94.4  | 94.2  | 94.4  | 94.5  | 94.4  | 94.0  | 93.6  | 93.8  |
| <b>Maternal age(year)</b>    |       |       |       |       |       |       |       |       |       |       |
| ≤ 20                         | 6.8   | 6.9   | 6.4   | 5.4   | 5.5   | 5.1   | 4.7   | 3.4   | 2.8   | 2.3   |
| 21-35                        | 87.0  | 86.6  | 87.3  | 88.2  | 87.6  | 88.0  | 87.2  | 87.9  | 85.6  | 85.8  |
| ≥ 36                         | 6.2   | 6.5   | 6.3   | 6.4   | 6.9   | 6.9   | 8.1   | 8.7   | 11.6  | 11.9  |
| <b>Maternal education</b>    |       |       |       |       |       |       |       |       |       |       |
| Primary school and below     | 17.6  | 7.6   | 2.6   | 2.1   | 1.9   | 1.6   | 1.6   | 1.4   | 1.1   | 1.2   |
| Secondary and high school    | 70.2  | 77.2  | 84.4  | 80.9  | 81.4  | 77.2  | 74.2  | 68.0  | 64.6  | 58.9  |
| College and above            | 12.2  | 15.2  | 13.0  | 17.0  | 16.7  | 21.2  | 24.2  | 30.6  | 34.4  | 39.9  |
| <b>Immigrant</b>             |       |       |       |       |       |       |       |       |       |       |
| No                           | 4.2   | 4.5   | 4.1   | 5.7   | 7.7   | 9.7   | 11.0  | 16.3  | 21.7  | 22.8  |
| Yes                          | 95.8  | 95.6  | 96.0  | 94.3  | 92.4  | 90.3  | 89.0  | 83.7  | 78.3  | 77.2  |

|                                                   |       |       |       |       |       |      |      |      |      |      |
|---------------------------------------------------|-------|-------|-------|-------|-------|------|------|------|------|------|
| <b>Parity</b>                                     |       |       |       |       |       |      |      |      |      |      |
| 0                                                 | 60.5  | 56.3  | 49.1  | 47.5  | 47.1  | 46.7 | 45.2 | 42.2 | 38.5 | 40.5 |
| ≥ 1                                               | 39.5  | 43.8  | 50.9  | 52.5  | 53.0  | 53.3 | 54.8 | 57.8 | 61.5 | 59.5 |
| <b>Multiple pregnancy</b>                         |       |       |       |       |       |      |      |      |      |      |
| No                                                | 98.1  | 98.3  | 98.2  | 98.3  | 98.0  | 97.9 | 97.7 | 97.5 | 97.5 | 97.3 |
| Yes                                               | 1.9   | 1.7   | 1.8   | 1.7   | 2.1   | 2.1  | 2.3  | 2.5  | 2.5  | 2.7  |
| <b>Delivery mode</b>                              |       |       |       |       |       |      |      |      |      |      |
| Vaginal deliveries                                | 64.8  | 65.5  | 64.8  | 64.9  | 64.5  | 67.0 | 67.9 | 67.0 | 64.2 | 65.2 |
| Labor induction/<br>Caesarean section             | 35.2  | 34.5  | 35.   | 35.1  | 35.5  | 33.0 | 32.1 | 33.0 | 35.8 | 34.8 |
| <b>Fertility treatment</b>                        |       |       |       |       |       |      |      |      |      |      |
| No                                                | 100.0 | 100.0 | 100.0 | 100.0 | 100.0 | 99.9 | 99.4 | 99.2 | 99.5 | 99.3 |
| Yes                                               | 0.0   | 0.0   | 0.0   | 0.0   | 0.0   | 0.1  | 0.7  | 0.8  | 0.5  | 0.7  |
| <b>First visit trimester</b>                      |       |       |       |       |       |      |      |      |      |      |
| First trimester                                   | 39.9  | 44.6  | 52.2  | 68.7  | 83.   | 83.4 | 84.2 | 84.0 | 88.7 | 91.7 |
| Second trimester                                  | 26.1  | 24.9  | 21.4  | 14.5  | 9.4   | 10.0 | 10.0 | 11.8 | 8.3  | 6.8  |
| Third trimester                                   | 34.0  | 30.5  | 26.5  | 16.8  | 7.4   | 6.6  | 5.9  | 4.2  | 3.1  | 1.5  |
| <b>Prenatal care utilisation rate<sup>b</sup></b> |       |       |       |       |       |      |      |      |      |      |
| < 50%                                             | 63.2  | 54.1  | 46.8  | 31.0  | 17.3  | 16.4 | 15.1 | 11.7 | 9.1  | 4.1  |
| 50% - <110%                                       | 31.3  | 40.5  | 47.3  | 60.4  | 71.6  | 70.9 | 70.7 | 69.0 | 59.7 | 51.1 |
| ≥ 110%                                            | 5.4   | 5.4   | 5.9   | 8.7   | 11.0  | 12.7 | 14.2 | 19.3 | 31.2 | 44.8 |
| <b>Infant Gender</b>                              |       |       |       |       |       |      |      |      |      |      |
| Female                                            | 45.0  | 45.4  | 45.9  | 45.8  | 46.3  | 45.6 | 46.1 | 46.5 | 46.4 | 46.2 |
| Male                                              | 55.0  | 54.6  | 54.1  | 54.2  | 53.7  | 54.4 | 53.9 | 53.5 | 53.6 | 53.8 |

a. The distribution percentage (%) for each category is the number of cases divided by the total number of preterm births.  
b. Prenatal care utilisation rate is defined as the ratio between the actual number of visits and the recommended number.

**Supplementary Table 4.** Analysis of Sociodemographic Factors Contributing to Variations of Preterm Birth Rate in Baoan, Shenzhen, 2009-2018<sup>a</sup>

|                                                   | Overall PTB |             | PROM-PTB  |             | S-PTB     |             | MI-PTB    |             |
|---------------------------------------------------|-------------|-------------|-----------|-------------|-----------|-------------|-----------|-------------|
|                                                   | AOR         | Rate change | AOR       | Rate change | AOR       | Rate change | AOR       | Rate change |
| <b>Maternal age(year)</b>                         |             |             |           |             |           |             |           |             |
| ≤20                                               | 1.5         |             | 1.2       |             | 2.2       |             | 0.6       |             |
| 21-35                                             | Reference   | 0.03%       | Reference | 0.00%       | Reference | -0.09%      | Reference | 0.15%       |
| ≥36                                               | 1.5         |             | 1.3       |             | 1.0       |             | 1.9       |             |
| <b>Maternal education</b>                         |             |             |           |             |           |             |           |             |
| Primary school and below                          | 1.4         |             | 1.5       |             | 1.8       |             | 1.1       |             |
| Secondary and high school                         | 1.3         | -0.22%      | 1.0       | -0.00%      | 1.4       | -0.14%      | 1.1       | -0.05%      |
| College and above                                 | Reference   |             | Reference |             | Reference |             | Reference |             |
| <b>Parity</b>                                     |             |             |           |             |           |             |           |             |
| 0                                                 | 1.1         | -0.06%      | 1.7       | -0.00%      | 1.2       | -0.05%      | 1.0       | 0.01%       |
| ≥ 1                                               | Reference   |             | Reference |             | Reference |             | Reference |             |
| <b>Multiple pregnancy</b>                         |             |             |           |             |           |             |           |             |
| No                                                | Reference   |             | Reference |             | Reference |             | Reference |             |
| Yes                                               | 18.3        | 0.28%       | 6.5       | 0.00%       | 2.9       | 0.02%       | 29.9      | 0.17%       |
| <b>Prenatal care utilisation rate<sup>b</sup></b> |             |             |           |             |           |             |           |             |
| < 50%                                             | 1.3         |             | 0.6       |             | 1.4       |             | 1.2       |             |
| 50% - <110%                                       | 0.7         | -0.45%      | 0.7       | 0.01%       | 0.8       | -0.27%      | 0.7       | -0.14%      |
| ≥ 110%                                            | Reference   |             | Reference |             | Reference |             | Reference |             |
| <b>Infant Gender</b>                              |             |             |           |             |           |             |           |             |
| Female                                            | Reference   |             | Reference |             | Reference |             | Reference |             |
| Male                                              | 1.3         | -0.01%      | 1.5       | 0.00%       | 1.3       | -0.01%      | 1.2       | -0.00%      |
| Projected Increase                                | -           | 0.24%       | -         | -0.00%      |           | -0.04%      |           | 0.22%       |

- a. 131,787 live births after the policy were included in the logistic regression model.
- b. Prenatal care utilisation rate is defined as the ratio between the actual number of visits and the recommended number.
- c. The distribution percentage for each category is the number of cases divided by the total number of preterm births.
- d. AOR: adjusted odds ratio
- e. AFp: Attributable risk fraction for the population.
- f. Preterm birth rate change is calculated by multiplying AFp with the preterm birth rate after the policy and subtract the result for before the policy.

Supplementary Table 5. Comparisons of Preterm Birth Rates and Risk Factor Distribution Percentages in Baoan, Shenzhen, 2003-2018<sup>a</sup>

|                                             | Distribution percentage(%) <sup>c</sup> |           | Preterm birth rate(%)  |           |
|---------------------------------------------|-----------------------------------------|-----------|------------------------|-----------|
|                                             | 2003-2012 <sup>c</sup>                  | 2009-2018 | 2003-2012 <sup>c</sup> | 2009-2018 |
| Overall Preterm Birth                       |                                         |           |                        |           |
| PROM-PTB                                    | -                                       |           | 0.54                   | 0.08      |
| S-PTB                                       | -                                       |           | 2.9                    | 3.1       |
| MI-PTB                                      | -                                       |           | 2.2                    | 2.6       |
| Gestational age(week)                       |                                         |           |                        |           |
| <28 weeks                                   | 10.3                                    | 1.1       | 0.6                    | 0.1       |
| 28-<32 weeks                                | 12.8                                    | 9.7       | 0.7                    | 0.6       |
| 32-<37 weeks                                | 76.9                                    | 89.2      | 4.3                    | 5.2       |
| Maternal age(year)                          |                                         |           |                        |           |
| ≤20                                         | 5.9                                     | 4.8       | 7.0                    | 8.0       |
| 21-35                                       | 88.8                                    | 87.2      | 5.4                    | 5.5       |
| ≥36                                         | 5.3                                     | 8.0       | 8.3                    | 8.5       |
| Maternal education                          |                                         |           |                        |           |
| Less than high school                       | 43.3                                    | 34.6      | 5.7                    | 5.8       |
| High school and college                     | 36.0                                    | 55.2      | 5.8                    | 5.9       |
| Bachelor                                    | 19.0                                    | 8.9       | 5.2                    | 5.3       |
| Postgraduate                                | 1.7                                     | 1.4       | 5.4                    | 4.7       |
| Parity                                      |                                         |           |                        |           |
| 0                                           | 62.1                                    | 46.8      | 5.8                    | 6.1       |
| ≥ 1                                         | 37.9                                    | 53.2      | 5.4                    | 5.6       |
| Prenatal care utilisation rate <sup>b</sup> |                                         |           |                        |           |
| < 50%                                       | 45.9                                    | 25.5      | 7.1                    | 6.4       |
| 50% - <110%                                 | 39.9                                    | 58.1      | 5.3                    | 4.9       |
| ≥ 110%                                      | 14.2                                    | 16.4      | 1.9                    | 8.2       |
| Infant Gender                               |                                         |           |                        |           |
| Female                                      | 45.7                                    | 46.0      | 5.3                    | 5.3       |
| Male                                        | 54.3                                    | 54.1      | 6.0                    | 6.3       |

a. Li C, Liang Z, Bloom MS, et al. Temporal trends of preterm birth in Shenzhen, China: a retrospective study. *Reprod Health* 2018;15(1):47.

b. Prenatal care utilisation rate is defined as the ratio between the actual number of visits and the recommended number.

c. The distribution percentage for each category is the number of cases divided by the total number of preterm births.
